# Supplementary material for: Increasing COVID-19 Vaccination Rates Among Patients With Serious Mental Illness: A Pilot Intervention Study
Source: Atypon-hosted journal article supplement (doi:10.1176/appi.ps.202100702), 2022-04-13
Supplement: appi.ps.202100702.ds001.pdf [file appi.ps.202100702.ds001.pdf]

## Supplementary Material: Covid-19 Vaccination Monitoring Tool

1. Acute COVID-19 symptoms at this visit: Yes \_\_\_\_\_ / No \_\_\_\_\_
2. Have you ever been tested for COVID-19?
  - a. No \_\_\_\_\_ (go to question 4)
  - b. Yes \_\_\_\_\_
  - c. How many times \_\_\_\_\_
3. Have you tested positive for COVID-19?
  - a. Yes \_\_\_\_ (Asymptomatic \_\_\_\_\_; Systemic Symptoms \_\_\_\_\_ Hospitalized \_\_\_\_\_)
  - b. No \_\_\_\_\_
4. Have you been offered the vaccine?
  - a. No \_\_\_\_\_ (go to question 6)
  - b. Yes \_\_\_\_\_
5. If you were offered the vaccine, did you accept it?
  - a. No (refused/declined) \_\_\_\_\_ (go to question 7)
  - b. Yes \_\_\_\_\_ Select: Moderna \_\_\_\_ / Pfizer-BioNTech \_\_\_\_ / Other \_\_\_\_\_
    - b1. 1st dose received/scheduled? Date: \_\_\_\_\_
      - Any Adverse effects from 1st dose?
        - Local pain, swelling, etc. on the arm: Yes \_\_\_\_ / No \_\_\_\_\_
        - Systemic (fever, chills, fatigue, headache, etc.): Mild \_\_\_\_ / Moderate \_\_\_\_ / Severe \_\_\_\_\_
    - b2. 2nd dose received/scheduled? Date: \_\_\_\_\_
      - Any Adverse effects from 2nd dose?
        - Local pain, swelling, etc. on the arm: Yes \_\_\_\_ / No \_\_\_\_\_
        - Systemic (fever, chills, fatigue, headache, etc.): Mild \_\_\_\_ / Moderate \_\_\_\_ / Severe \_\_\_\_\_
6. How likely are you to accept a COVID-19 vaccine if becomes available to you right now? \_\_\_\_\_  
(on a 5-point scale, 1=very unlikely; 5=very likely)
7. What concerns do you have about COVID-19 vaccination?
  - a. \_\_\_\_ Not enough info (wait and see)
  - b. \_\_\_\_ I'm worried about side effects.
  - c. \_\_\_\_ Vaccine is not effective and cannot protect me.
  - d. \_\_\_\_ No need (I will not catch COVID19/COVID19 is harmless/already immunized by getting COVID-19)
  - e. \_\_\_\_ Lack of trust (government / healthcare / pharma)
  - f. \_\_\_\_ Conspiracy theories (5G, microchipping, etc.)
  - g. \_\_\_\_ Hassle (scheduling / transportation / wait time / cost / crowds / answering questions)
  - h. \_\_\_\_ Needle phobia
  - i. \_\_\_\_ Other (specify)
